# Supplementary material for: High-throughput generation of midbrain dopaminergic neuron organoids from reporter human pluripotent stem cells
Source: PubMed Central journal article supplement (PMC8086141; doi:10.1016/j.xpro.2021.100463), 2021-04-19

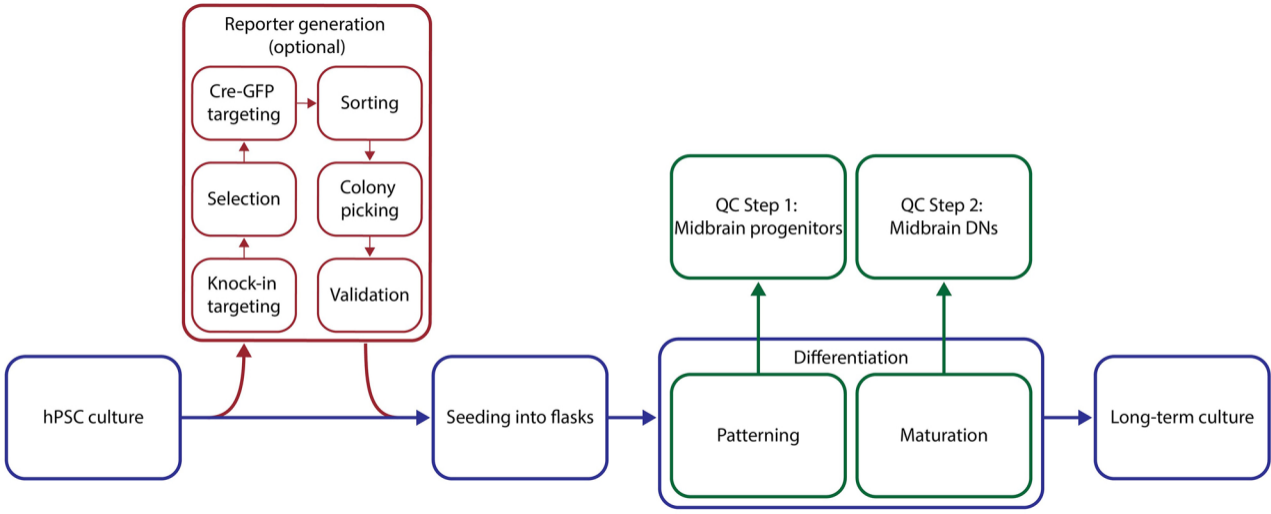

Supplement: mmc1.pdf [file mmc1.pdf]
